# Supplementary material for: Nanoscale Surface Topography Modulates hIAPP Aggregation Pathways at Solid–Liquid Interfaces
Source: MDPI journal article supplement (doi:10.3390/ijms22105142), 2021-05-13
Supplement: s1 [file s1]

# Supplementary Materials

## Nanoscale Surface Topography Modulates hIAPP Aggregation Pathways at Solid–Liquid Interfaces

*Marcel Hanke, Yu Yang, Yuxin Ji, Guido Grundmeier and Adrian Keller\**

Paderborn University, Technical and Macromolecular Chemistry, Warburger Str. 100, 33098  
Paderborn, Germany.

\* Correspondence: [adrian.keller@uni-paderborn.de](mailto:adrian.keller@uni-paderborn.de), Tel.: +49-5251-60-5722

### ThT fluorescence analysis of hIAPP aggregation bulk solution

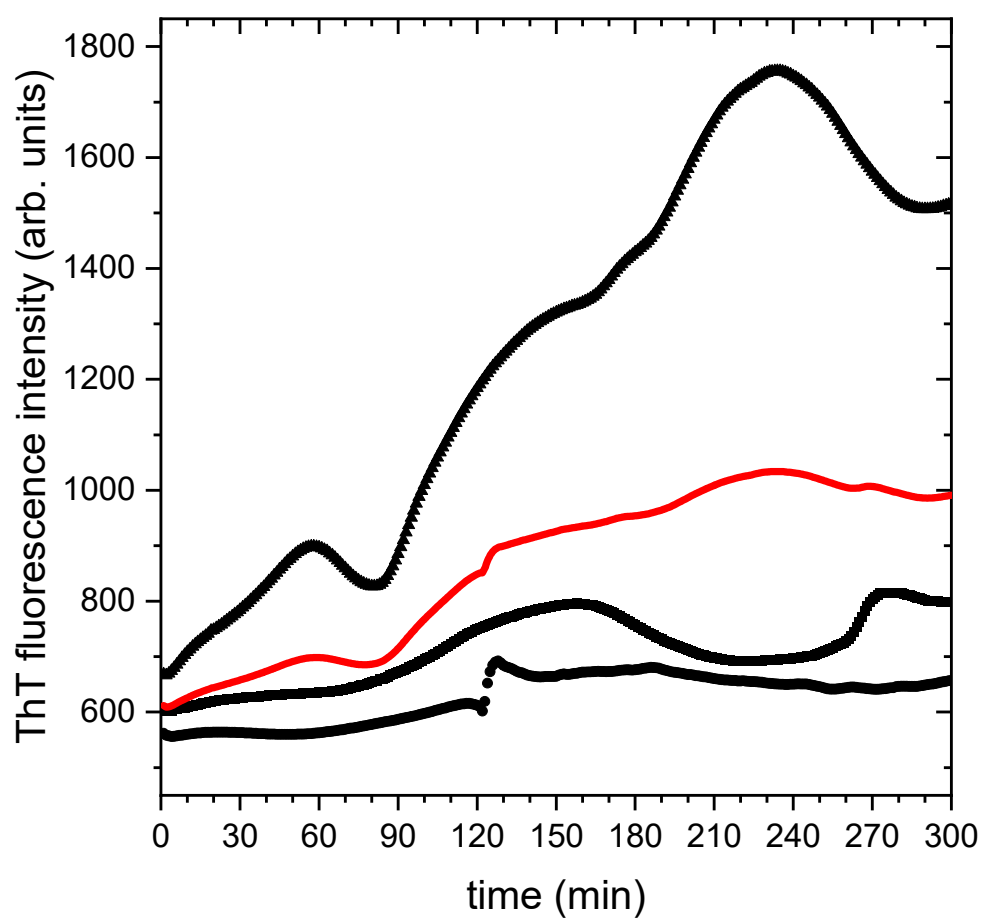

**Figure S1:** ThT fluorescence measurements of hIAPP aggregation in bulk solution. The black data represent three independent measurements while the red curve is their average. Even though the overall fluorescence intensity varies a lot between individual measurements, all curves show an increase in intensity between 60 and 90 min, followed with a saturation regime that is entered between 130 and 160 min.

# Additional AFM images of hIAPP aggregates formed in bulk solution

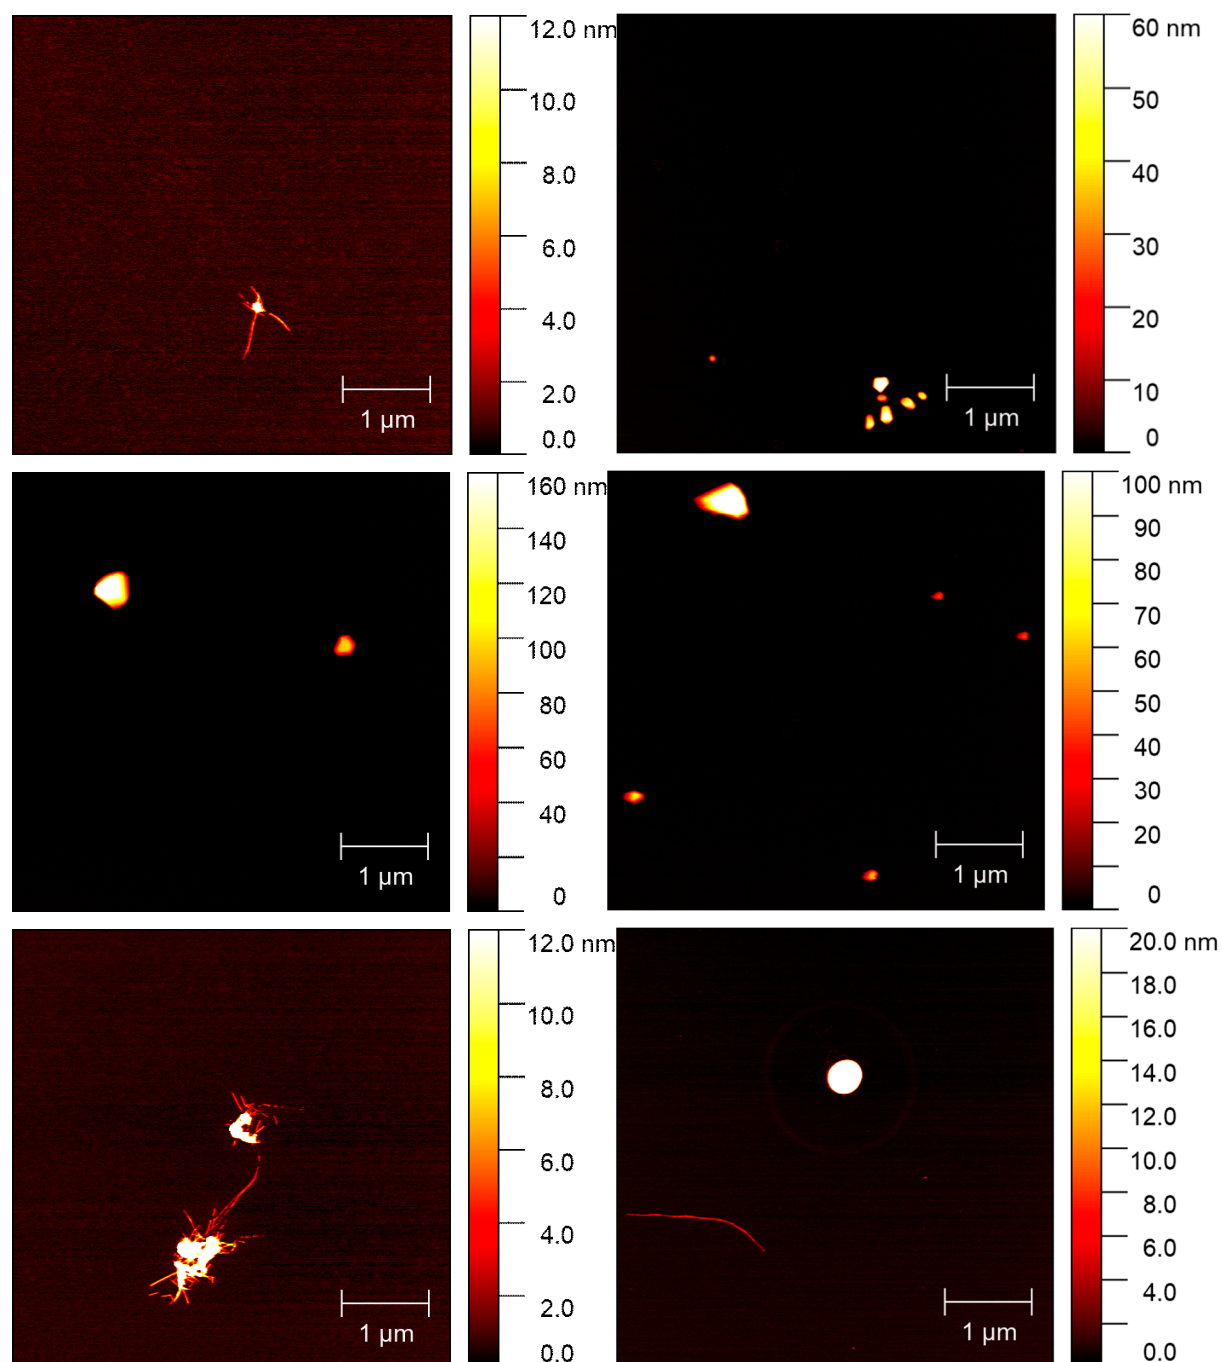

**Figure S2:** AFM images of hIAPP aggregates obtained after 30 min (left) and 210 min (right) incubation in bulk solution without ThT.

**Additional AFM images of hIAPP aggregates formed at the flat and nanorippled surfaces**

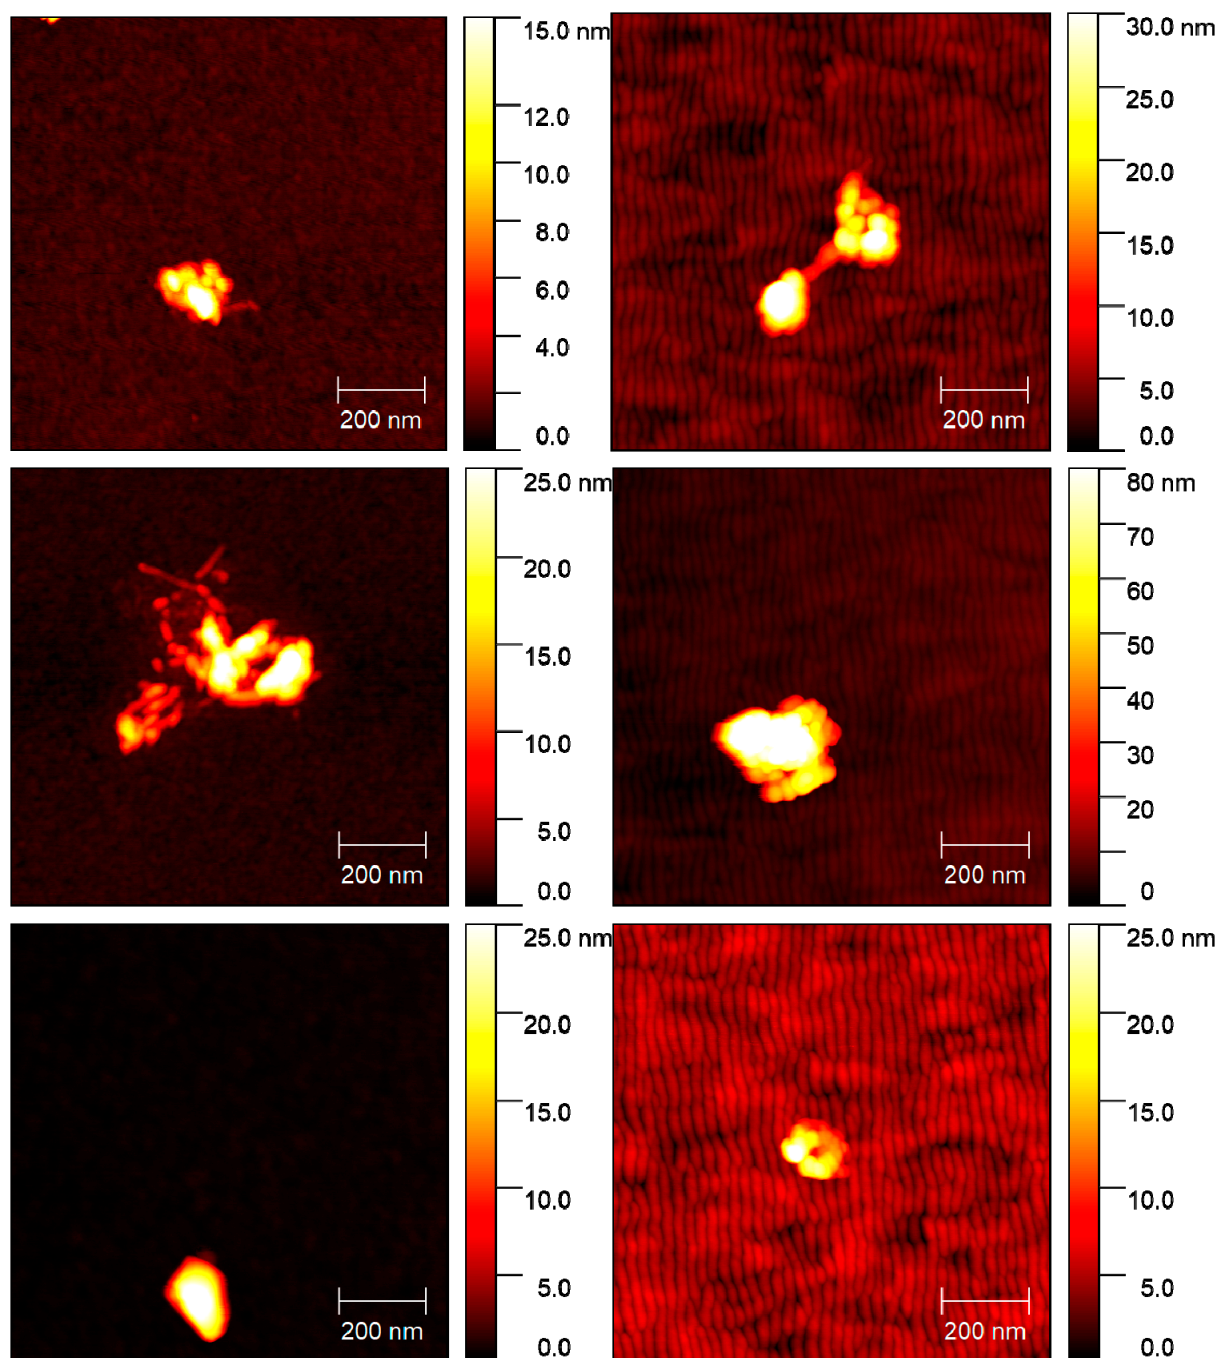

**Figure S3:** AFM images of hIAPP aggregates obtained after 15 min incubation in contact with the flat (left) and nanorippled (right) surfaces.



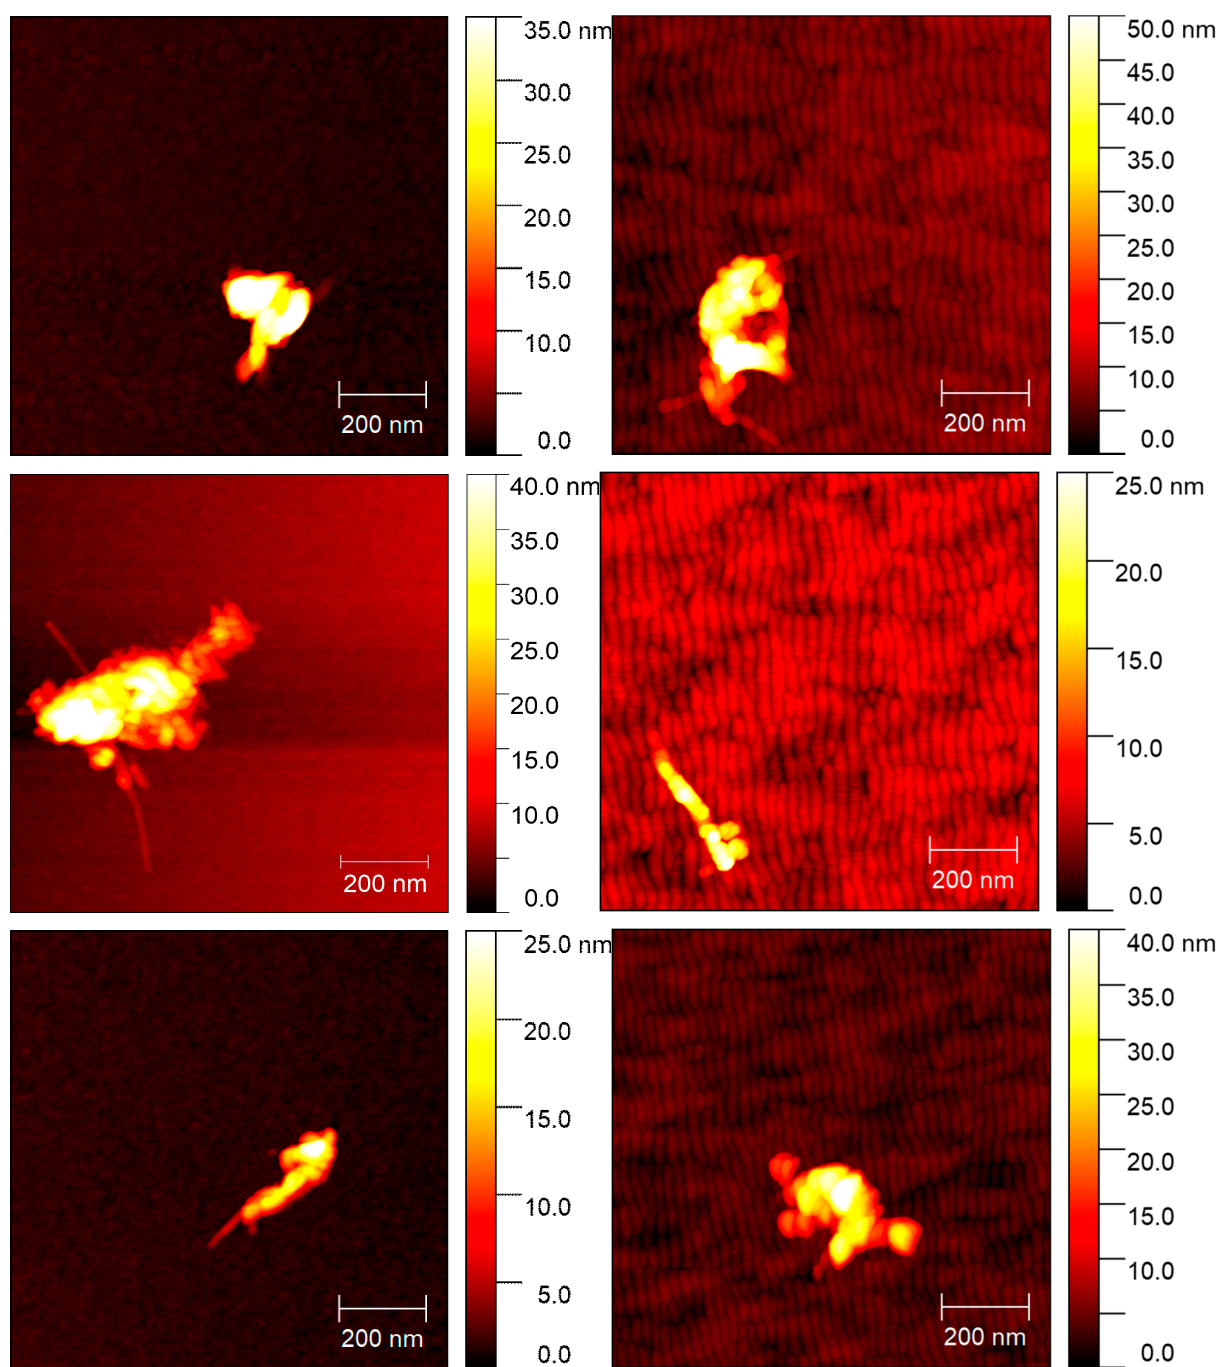

**Figure S4:** AFM images of hIAPP aggregates obtained after 30 min incubation in contact with the flat (left) and nanorippled (right) surfaces.

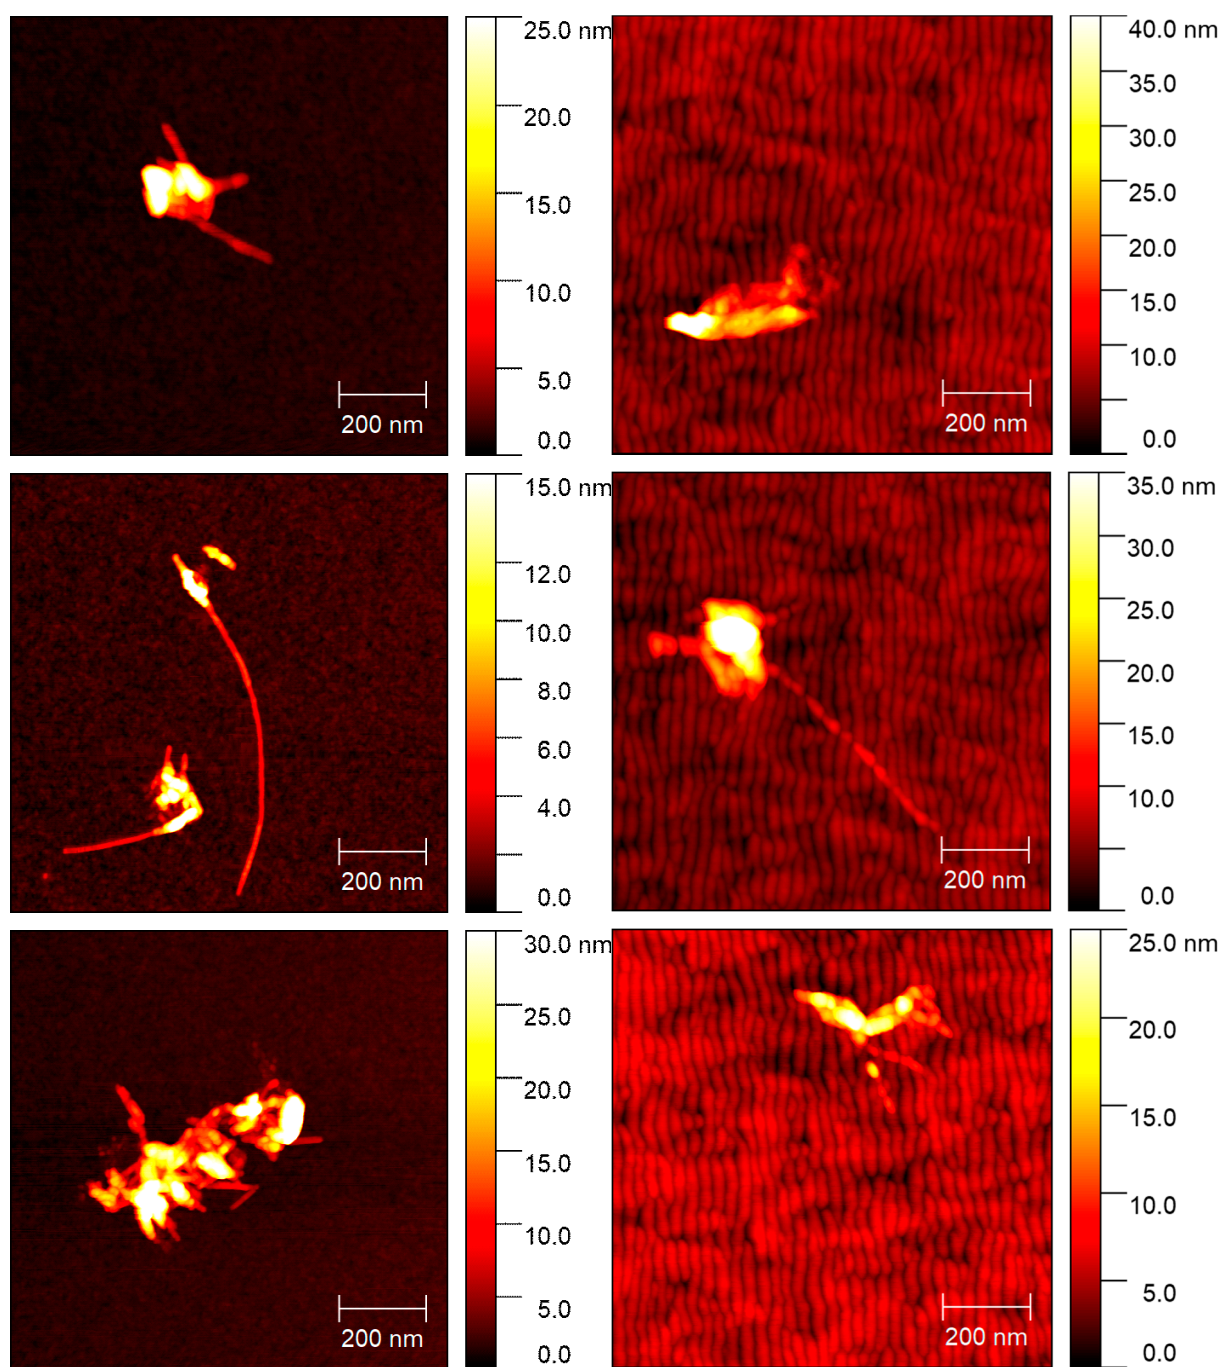

**Figure S5:** AFM images of hIAPP aggregates obtained after 60 min incubation in contact with the flat (left) and nanorippled (right) surfaces.

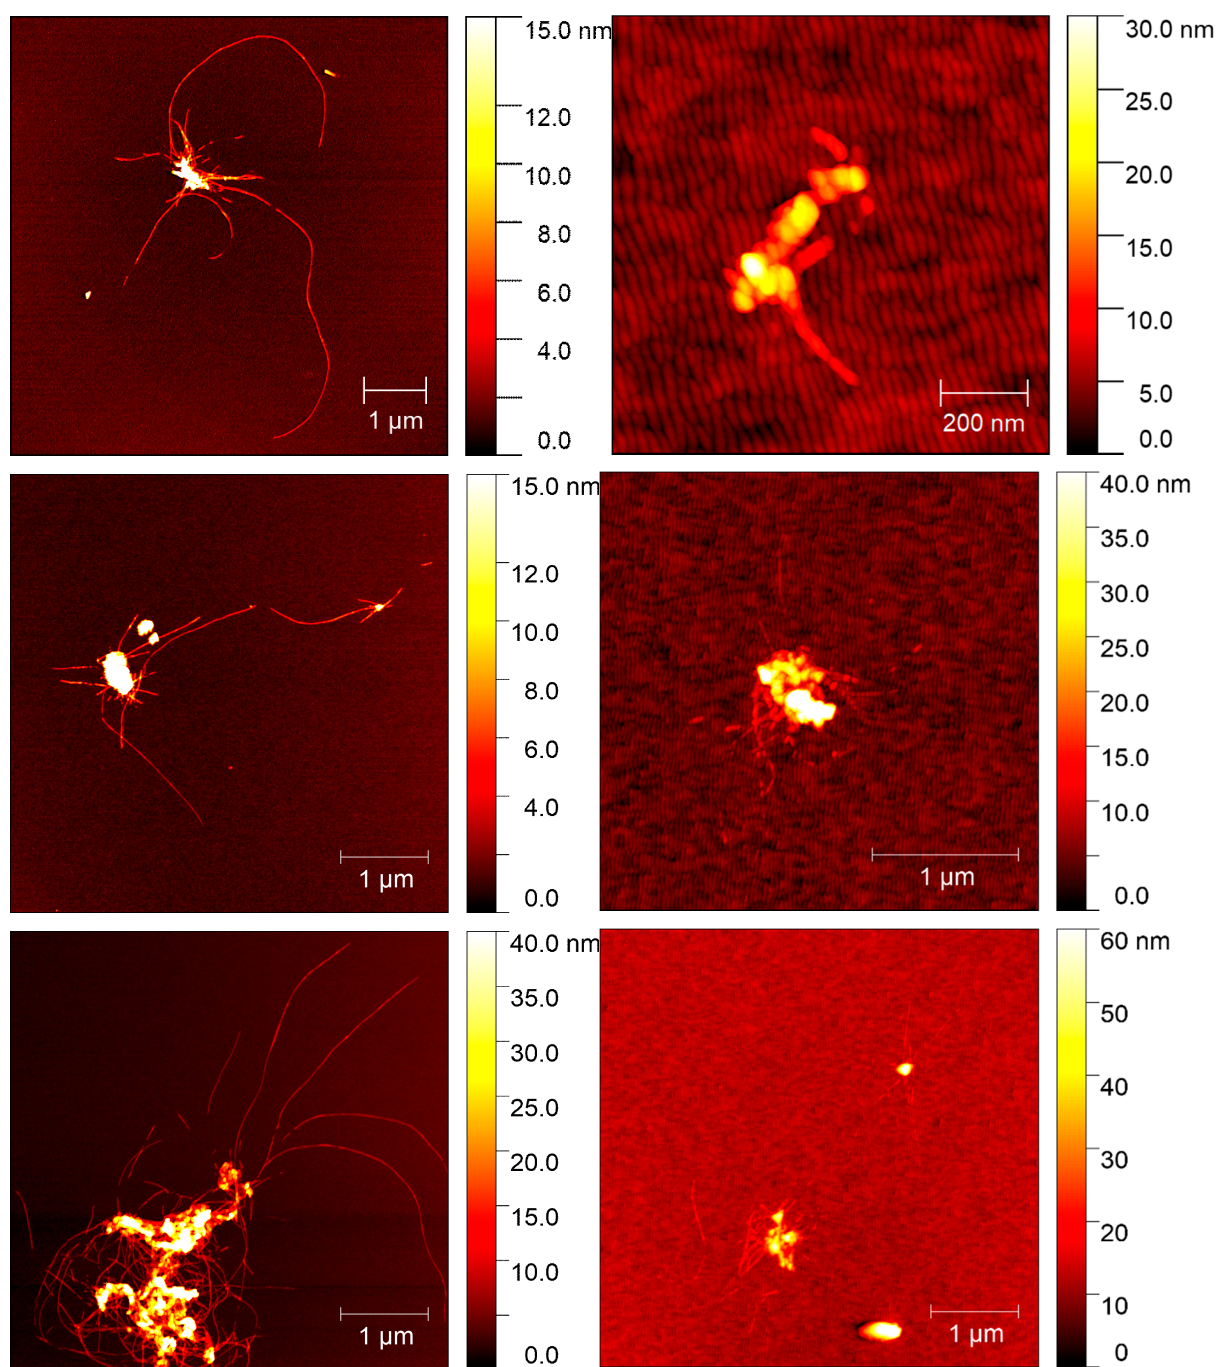

**Figure S6:** AFM images of hIAPP aggregates obtained after 180 min incubation in contact the flat (left) and nanorippled (right) surfaces.
